# Supplementary material for: miR-155-5p inhibition promotes the transition of bone marrow mesenchymal stem cells to gastric cancer tissue derived MSC-like cells via NF-κB p65 activation
Source: PubMed Central journal article supplement (PMC4941335; doi:10.18632/oncotarget.7767), 2016-02-26
Supplement: oncotarget-07-16567-s001.pdf [file oncotarget-07-16567-s001.pdf]

# miR-155-5p inhibition promotes the transition of bone marrow mesenchymal stem cells to gastric cancer tissue derived MSC-like cells via NF- $\kappa$ B p65 activation

## Supplementary Material

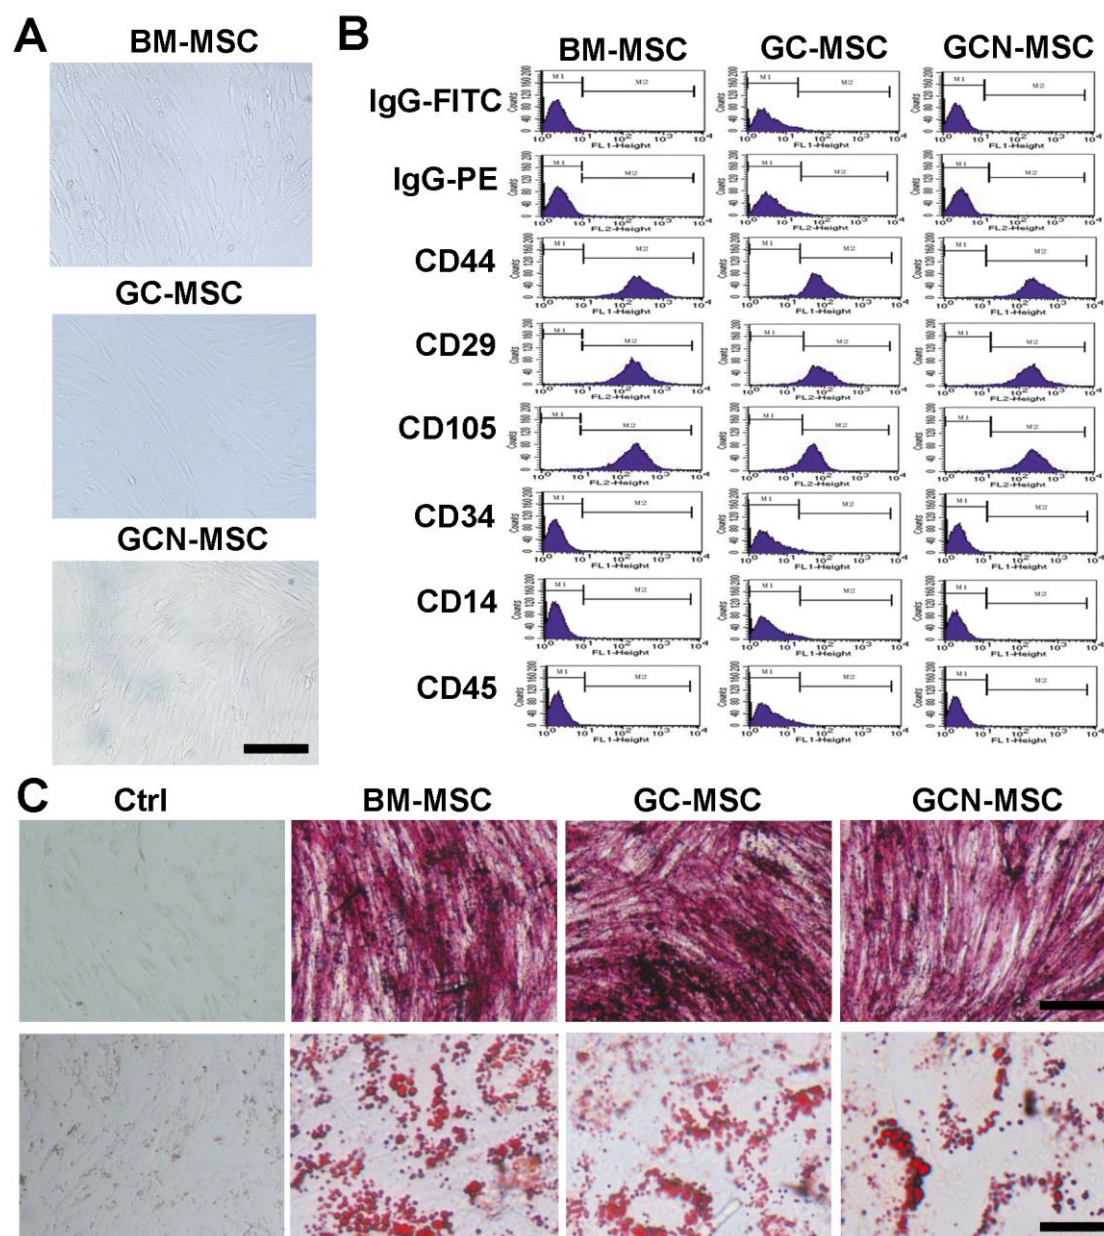

**Supplementary Figure 1: Isolation and characteristics of mesenchymal stem cells**

A. Morphological appearance of bone marrow mesenchymal stem cells (BM-MSC), gastric cancer tissues derived MSC-like cells (GC-MSC) and adjacent non-cancerous gastric tissues derived MSC-like cells (GCN-MSC) in the 3rd passage. Magnification:  $\times 100$ , Scale bar=50 $\mu$ m. B. Flow cytometric analysis of the surface

antigens of BM-MSC, GC-MSC and GCN-MSC. Monoclonal antibodies against CD44, CD34, CD14 and CD45 were FITC-conjugated, while CD29 and CD105 were PE-conjugated. IgG-PE and IgG-FITC were used in the control group. C. Differentiation potential of BM-MSC, GC-MSC and GCN-MSC. MSCs grew in adipogenic or osteogenic medium for two weeks. Upper: Alkaline phosphatase staining detection for osteogenic differentiation; Lower: Oil-Red-O staining detection for adipogenic differentiation. Magnification:  $\times 100$ , Scale bar = 50 $\mu\text{m}$ .

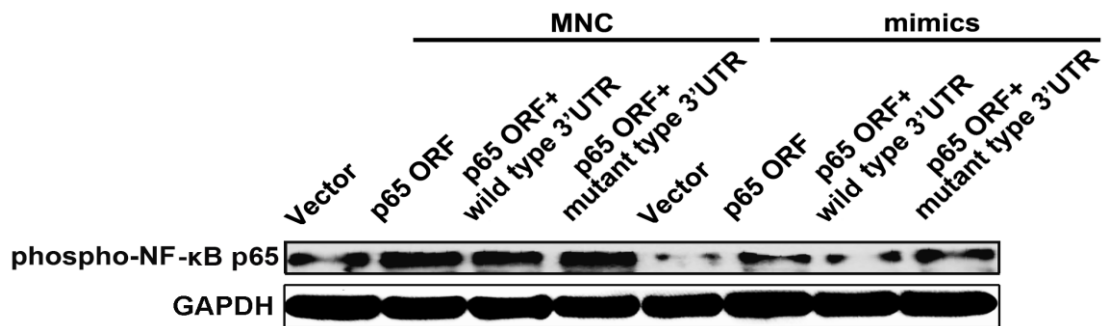

**Supplementary Figure 2: Phosphorylation level of NF-κB p65 detection in BM-MSC co-transfected with ORF constructs and miR-155-5p mimics**

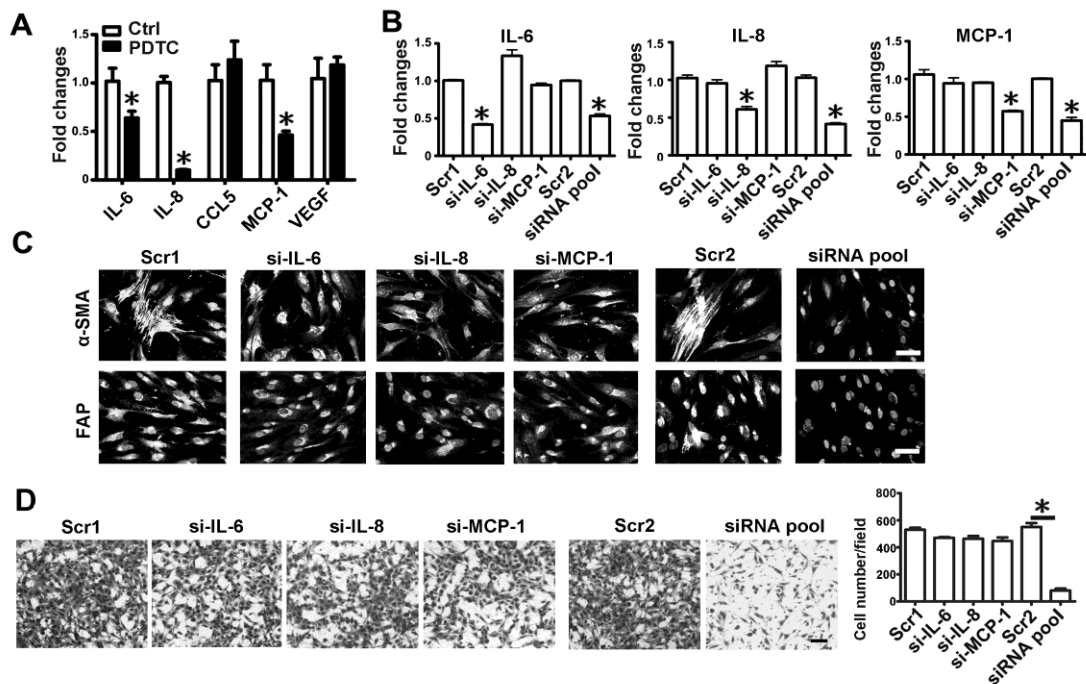

### Supplementary Figure 3: Downstream molecules of NF-κB p65 identification and their function analysis in GC-MSC

A. *qRT-PCR* of cytokine mRNA expression in GC-MSC after treated with PDTC. B.-D. GC-MSC was transfected with siRNA against each cytokine separately or siRNA pool. B, *qRT-PCR* of IL-6, IL-8 and MCP-1 mRNA expression. C. α-SMA and FAP protein levels detected by immunofluorescent staining, Magnification: 200×, *Scale bar* = 50μm. D. Migration analysis. Magnification: 100×, *Scale bar* = 50μm. Representative graphs were shown. Cell number of each field were counted and presented as columns. Data were presented as Means ±SD. \*,  $P < 0.05$ .

**Supplementary Table 1: Primers sequences for *q*RT-PCR and the conditions of amplification**

| <b>Genes</b>   | <b>Primers sequences (5'-3')</b>                                                     | <b>Annealing Temperatures(°C)</b> | <b>Product length(bp)</b> |
|----------------|--------------------------------------------------------------------------------------|-----------------------------------|---------------------------|
| $\beta$ -actin | For <sup>a</sup> :CACGAAACTACTCCCAACTCC<br>Rev <sup>b</sup> :CATACTCC TGCTTGAGCTGATC | 56                                | 265                       |
| IL-6           | For <sup>a</sup> : TACATCCTCGACGGCATCTC<br>Rev <sup>b</sup> : AGCTCTGGCTTGTTCCCTCAC  | 61                                | 252                       |
| IL-8           | For <sup>a</sup> :GCTCTGTGTGAAGGTGCAGTTT<br>Rev <sup>b</sup> :TTCTGTGTTGGCGCAGTGT    | 62                                | 144                       |
| CCL5           | For <sup>a</sup> :GGATTCCTGCAGAGGATCAA<br>Rev <sup>b</sup> :GTGGTGTCCGAGGAATATGG     | 62                                | 154                       |
| MCP-1          | For <sup>a</sup> :GAACCGAGAGGCTGAGACTA<br>Rev <sup>b</sup> :GCCTCTGCACTGAGATCTTC     | 59                                | 259                       |
| VEGF           | For <sup>a</sup> : CCTTGCTGCTCTACCTCCAC<br>Rev <sup>b</sup> :ATCTGCATGGTGATGTTGGA    | 58                                | 280                       |

<sup>a</sup> For, forward primer; <sup>b</sup> Rev, reverse primer. h, human

**Supplementary Table 2: Sequences and modifications of the oligonucleotides**

| <b>oligonucleotide</b>              | <b>Sequences(5'-3')</b>                                           | <b>modification</b>  |
|-------------------------------------|-------------------------------------------------------------------|----------------------|
| Mimics negative control<br>(MNC)    | Sense:UUCUCCGAACGUGUCACGUTT<br>Antisense:ACGUGACACGUUCGGAGAATT    |                      |
| miR-155-5p mimics                   | Sense:UUAAUGCUAAUCGUGAUAGGGGU<br>Antisense:CCCUAUCACGAUUAGCAUUAUU | 2'-O-Methyl-modified |
| Inhibitor negative control<br>(INC) | CAGUACUUUUGUGUAGUACAA                                             | 2'-O-Methyl-modified |
| miR-155-5p inhibitor                | ACCCCUAUCACGAUUAGCAUUA                                            |                      |
| Scramble control<br>(Scr)           | Sense:UUCUCCGAACGUGUCACGUTT<br>Antisense:ACGUGACACGUUCGGAGAATT    |                      |
| si-NF-κB p65                        | Sense:CCUCCUUUCAGGAGAUGAATT<br>Antisense:UUCAUCUCCUGAAAGGAGGTT    |                      |
| si-IKBKE                            | Sense:GCUGAACACCAGAACAUTT<br>Antisense:AAUGUUCUGGUGGUUCAGCTT      |                      |
| si-IL6                              | Sense:CCCAGGAGAAGAUUCCAAATT<br>Antisense:UUUGGAAUCUUCUCCUGGGTT    | 2'-O-Methyl-modified |
| si-IL8                              | Sense:GCCAGAUGCAAUACAAGAUTT<br>Antisense:AUCUUGUAUUGCAUCUGGCTT    |                      |
| si-MCP-1                            | Sense:GCUGUUAUAACUUCACCAATT<br>Antisense:UUGGUGAAGUUAUAACAGCTT    |                      |

**Supplementary Table 3: Primers sequences for vector construction**

| Vector                             | Primers sequences (5'-3')                                                                                                                                                                                                                                                                                                                                                                |
|------------------------------------|------------------------------------------------------------------------------------------------------------------------------------------------------------------------------------------------------------------------------------------------------------------------------------------------------------------------------------------------------------------------------------------|
| luc-NF-κB p65 3'UTR<br>wild type   | For <sup>a</sup> : GAAGCCCTCCAAAAGCACTTAC<br>Rev <sup>b</sup> : CTAGCCAGCTTGGCAACAGAT                                                                                                                                                                                                                                                                                                    |
| luc-NF-κB p65 3'UTR<br>mutant type | For <sup>a</sup> :tctcttttggaggtgcttaagcagact <b><i>gtcga</i></b> aacttctctggaaagggggga<br>gctgg<br>Rev <sup>b</sup> :ccagctccccctttccagagaagtt <b><i>gacagt</i></b> tctgcttaagcacctccaaa<br>aagaga                                                                                                                                                                                      |
| luc-IKBKE p65 3'UTR<br>wild type   | For <sup>a</sup> : TGAAGCTGCTGGCATCTGAC<br>Rev <sup>b</sup> : ATGGAGGAGCAGTACCTGAG                                                                                                                                                                                                                                                                                                       |
| luc-IKBKE p65 3'UTR<br>mutant type | For <sup>1a</sup> :gctccatggggcacatgaggcacctctgact <b><i>gtcga</i></b> agaatgattccaact<br>gctcttc<br>Rev <sup>1b</sup> :gaagagcagtggtggaatcattct <b><i>gacagt</i></b> caggatgcctcatgtgcccc<br>atggagc<br>For <sup>2a</sup> : gctgctggccaggatgtcgcc <b><i>ctgtcga</i></b> accttccactgcctttctccc<br>Rev <sup>2b</sup> :gggagaaaggcagtggaaggt <b><i>gacag</i></b> ggcgacatcctggccagcag<br>c |

<sup>a</sup> For, forward primer; <sup>b</sup> Rev, reverse primer; <sup>c</sup> Sequences in italic and bold indicate mutant sites.
